# Supplementary material for: A convergent structure-function substrate of cognitive imbalances in autism
Source: bioRxiv or medRxiv preprint supplement (doi:10.1101/2021.01.14.426284), 2021-01-14
Supplement: Supplementary file [file media-1.pdf]

## **A convergent structure-function substrate of cognitive imbalances in autism**

Seok-Jun Hong<sup>1,2,3,4\*</sup>, Laurent Mottron<sup>5</sup>, Bo-yong Park<sup>1</sup>, Oualid Benkarim<sup>1</sup>, Sofie L. Valk<sup>1,6,7</sup>, Casey Paquola<sup>1</sup>, Sara Larivière<sup>1</sup>, Reinder Vos de Wael<sup>1</sup>, Janie Degré-Pelletier<sup>1,8</sup>, Isabelle Soulieres<sup>8</sup>, Bruce Ramphal<sup>9</sup>, Amy Margolis<sup>9</sup>, Michael Milham<sup>2,10</sup>, Adriana Di Martino<sup>11</sup>, Boris C. Bernhardt<sup>1\*</sup>

*1) Multimodal Imaging and Connectome Analysis Laboratory, McConnell Brain Imaging Centre, Montreal Neurological Institute and Hospital, McGill University, Montreal, Canada; 2) Center for the Developing Brain, Child Mind Institute, New York, NY, USA; 3) Center for Neuroscience Imaging Research, Institute for Basic Science, Sungkyunkwan University, Suwon, South Korea; 4) Department of Biomedical Engineering, Sungkyunkwan University, Suwon, South Korea; 5) Centre de recherche du CIUSSS-NIM and Department of Psychiatry, Université de Montréal, Montreal, QC, Canada; 6) Institute of Neuroscience and Medicine (INM-7: Brain and Behaviour), Research Centre Jülich, Germany; 7) Institute of Systems Neuroscience, Heinrich Heine University Düsseldorf, Germany; 8) Department of Psychology, Université du Québec à Montréal, Montréal, QC, Canada; 9) Department of Psychiatry, The New York State Psychiatric Institute and the College of Physicians Surgeons, Columbia University, New York, NY, USA; 10) Center for Biomedical Imaging and Neuromodulation, Nathan Kline Institute, NY, USA; 11) Autism Center, Child Mind Institute, New York, NY, USA*

### **Supplementary Materials**

**Supplementary Table 1.** Clinical and demographic profiles of identified subtypes in the imaging cohort.

|                                       | Subtypes  |           |           |           | p-value<br>(ANOVA/Chi <sup>2</sup> ) |
|---------------------------------------|-----------|-----------|-----------|-----------|--------------------------------------|
|                                       | S1 (n=33) | S2 (n=41) | S3 (n=34) | S4 (n=47) |                                      |
| Age (y) <sup>†</sup>                  | 17.8±8.8  | 18.9±7.9  | 19.7±10.7 | 15.8±6.9  | 0.17                                 |
| Sex (f/m)                             | 2/31      | 2/39      | 1/34      | 1/46      | 0.23                                 |
| Site (# of cases)<br>PITT/USM/NYU/TCD | 1/17/13/2 | 6/15/17/3 | 8/8/12/6  | 5/12/23/7 | 0.33                                 |
| Full scale IQ <sup>†</sup>            | 82±7      | 106±6     | 127±6     | 104±9     | >0.0001                              |
| Verbal IQ <sup>†</sup>                | 80±8      | 99±9      | 121±8     | 109±9     | >0.0001                              |
| Non-verbal IQ <sup>†</sup>            | 88±12     | 113±7     | 126±9     | 97±9      | >0.0001                              |
| vnIQ (z-score) <sup>†</sup>           | -0.8±1.4  | -1.1±0.8  | -0.5±0.8  | 0.9±0.9   | >0.0001                              |
| Calibrated ADOS <sup>†</sup>          | 7.2±2.0   | 6.5±2.1   | 6.0±2.0   | 6.1±1.9   | 0.039                                |

†: Mean±SD

**A. Cortical surface extraction quality**

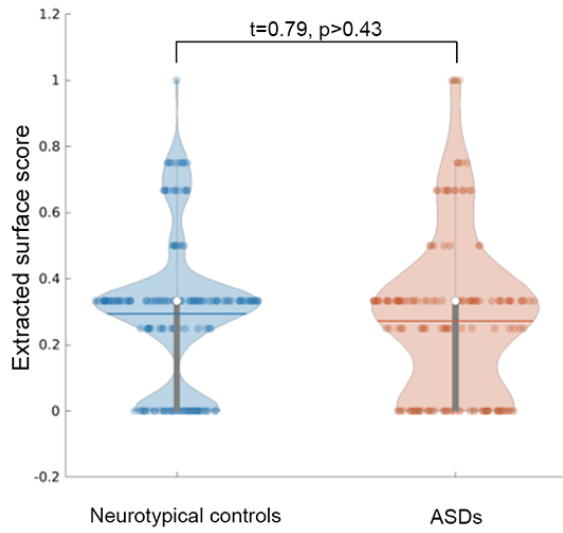

**B. Head motion in rs-fMRI data**

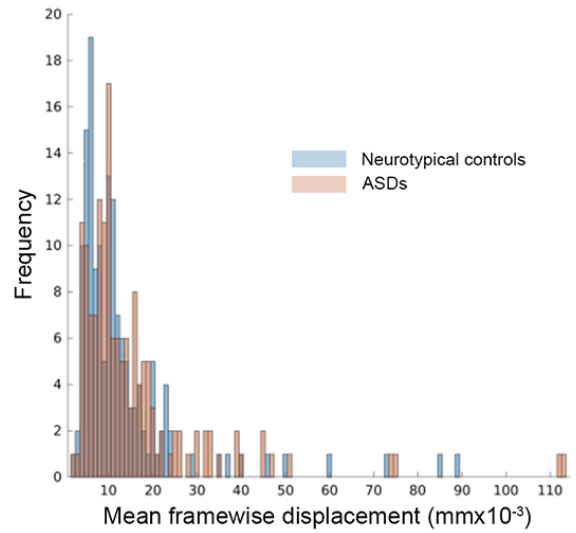

**Supplementary Figure 1. Quality of structural and functional MRI data.**

A. Cross-site reproducibility of group interaction effects between cortical thickness and vnlQ

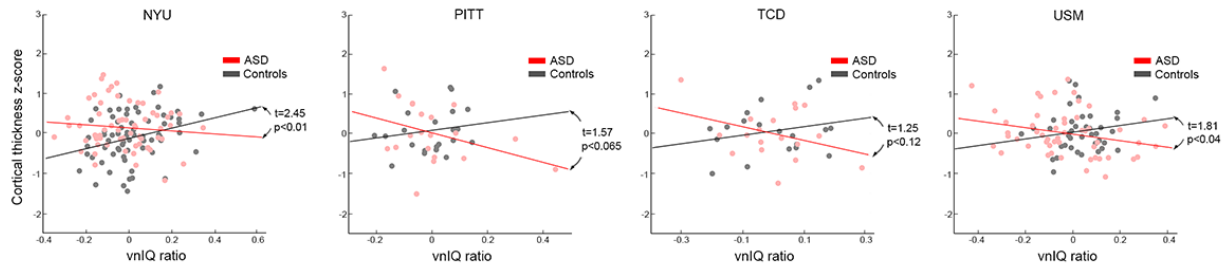

B. Reproducibility between children and adult groups

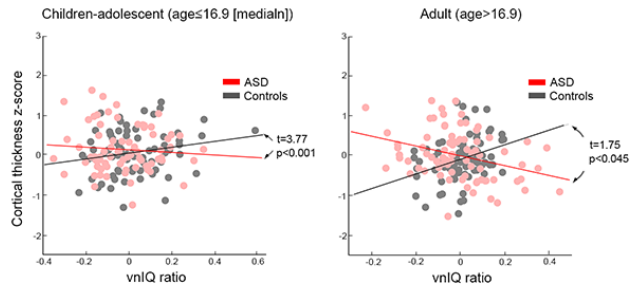

C. Atlas-based analysis targeting language networks

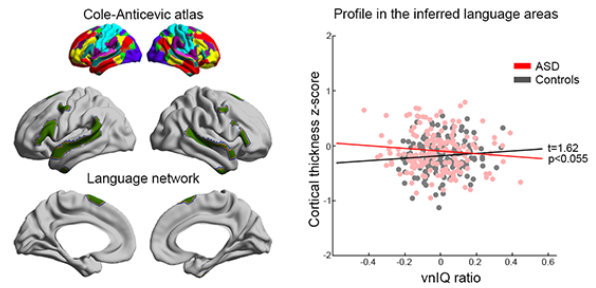

**Supplementary Figure 2. Cross-site and -age reproducibility test for correlative association of cortical thickness to vnlQ ratio**

Whole-brain interaction effects between functional connectivity and vniQ ratio after GSR

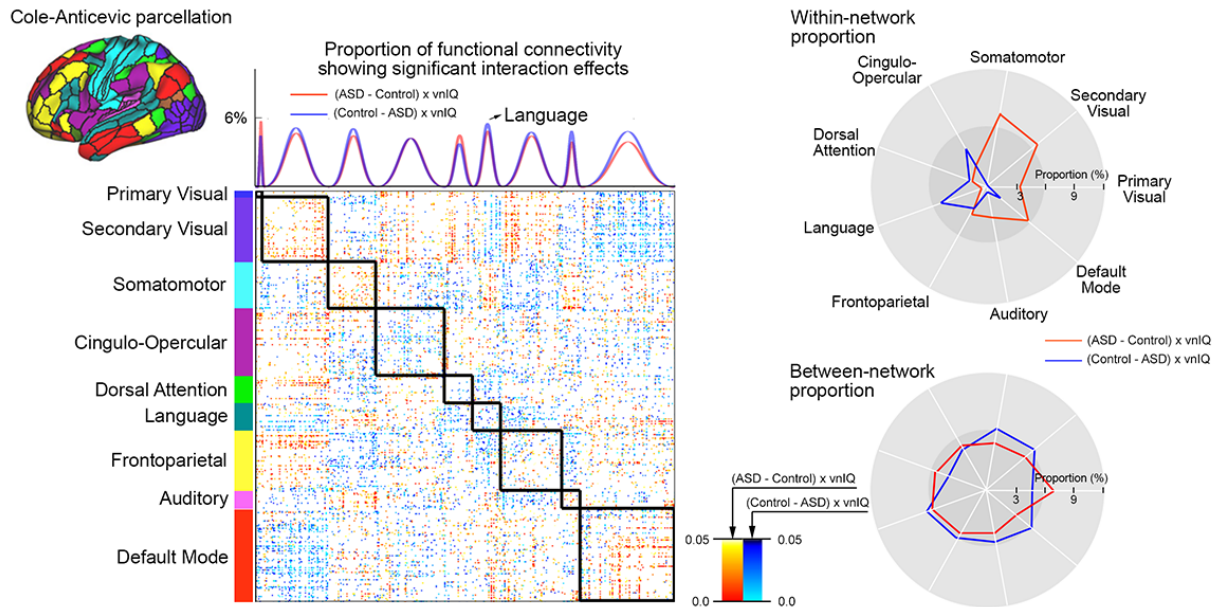

**Supplementary Figure 3. Reproducibility of interaction effect on whole-brain functional connectivity after global mean signal regression**

A. Site-wise reproducibility of interaction effects in functional connectivity

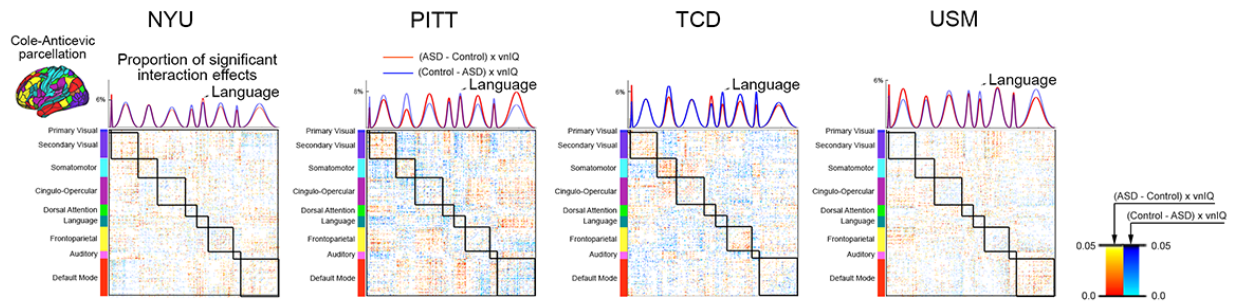

B. Age-wise reproducibility of interaction effects in functional connectivity

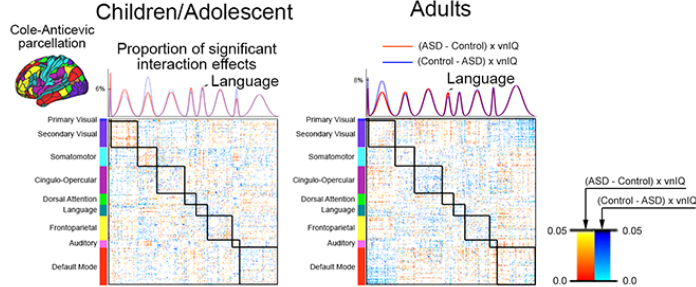

**Supplementary Figure 4. Reproducibility of interaction effect on whole-brain functional connectivity across different sites and age ranges.**

### Subtyping based on replication data

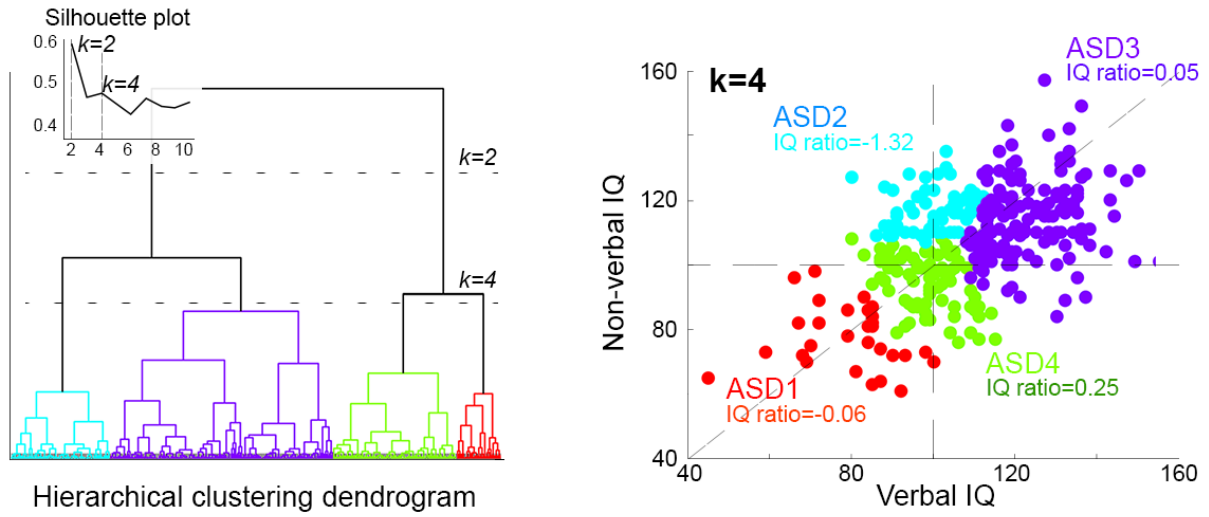

**Supplementary Figure 5. IQ clustering in the independent dataset.**

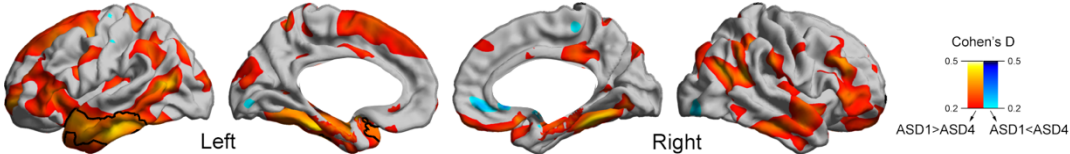

**Supplementary Figure 6. Cortical thickness group comparison between ASD-1 and -4 subtypes.**



### Principal components in IQ distribution based on replication data

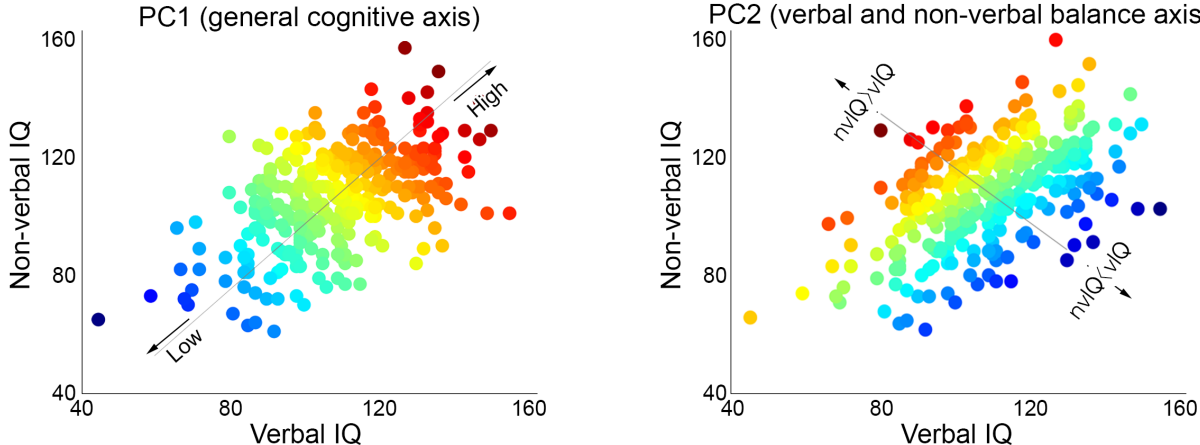

**Supplementary Figure 7. Dimensional IQ components in the independent dataset.**
